# Supplementary material for: New Bioactive Alkyl Sulfates from Mediterranean Tunicates
Source: Molecules. 2012 Oct 26;17(11):12642–50. doi: 10.3390/molecules171112642 (PMC6268736; doi:10.3390/molecules171112642)

## Supplementary Materials

|                                                  |     |
|--------------------------------------------------|-----|
| <sup>1</sup> H-NMR spectrum of compound <b>1</b> | S2  |
| COSY spectrum of compound <b>1</b>               | S3  |
| HSQC spectrum of compound <b>1</b>               | S4  |
| HMBC spectrum of compound <b>1</b>               | S5  |
| HRESI mass spectrum of compound <b>1</b>         | S6  |
| <sup>1</sup> H-NMR spectrum of compound <b>2</b> | S7  |
| COSY spectrum of compound <b>2</b>               | S8  |
| HSQC spectrum of compound <b>2</b>               | S9  |
| HMBC spectrum of compound <b>2</b>               | S10 |
| HRESI mass spectrum of compound <b>2</b>         | S11 |
| <sup>1</sup> H-NMR spectrum of compound <b>3</b> | S12 |
| COSY spectrum of compound <b>3</b>               | S13 |
| HSQC spectrum of compound <b>3</b>               | S14 |
| HMBC spectrum of compound <b>3</b>               | S15 |
| HRESI mass spectrum of compound <b>3</b>         | S16 |

$^1\text{H}$ -NMR spectrum of compound **1**.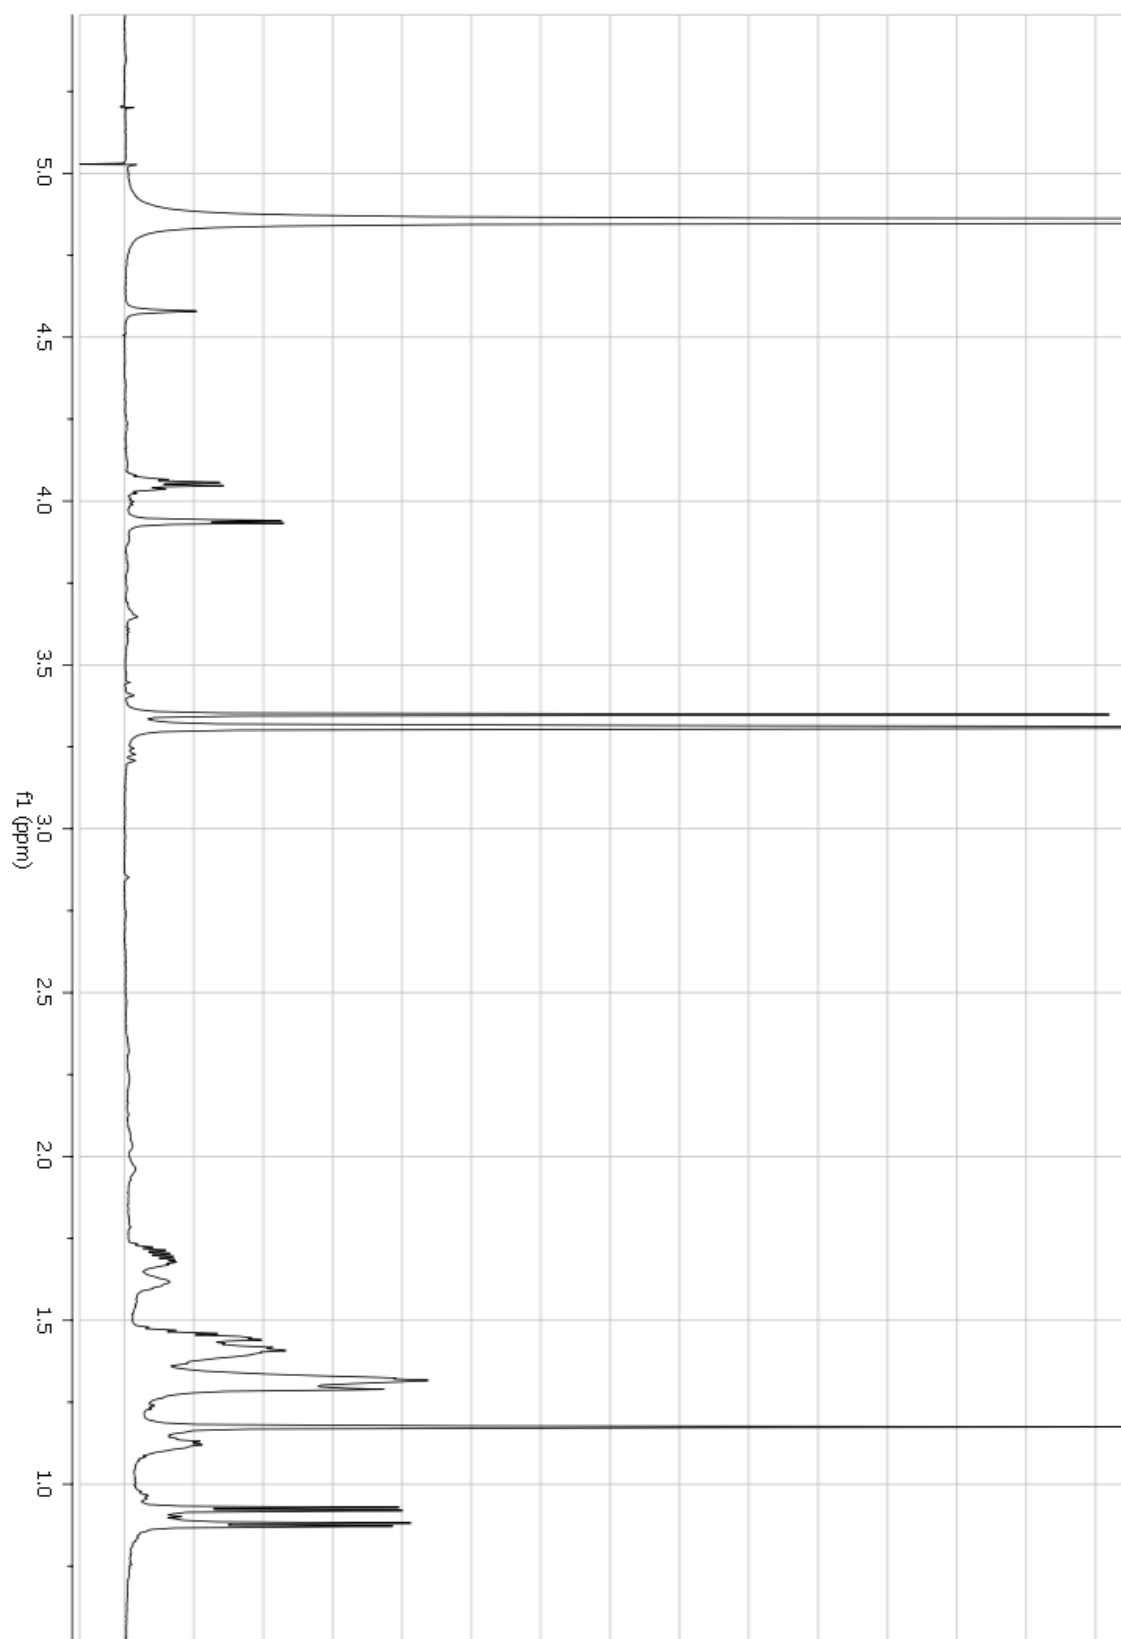

COSY spectrum of compound 1.

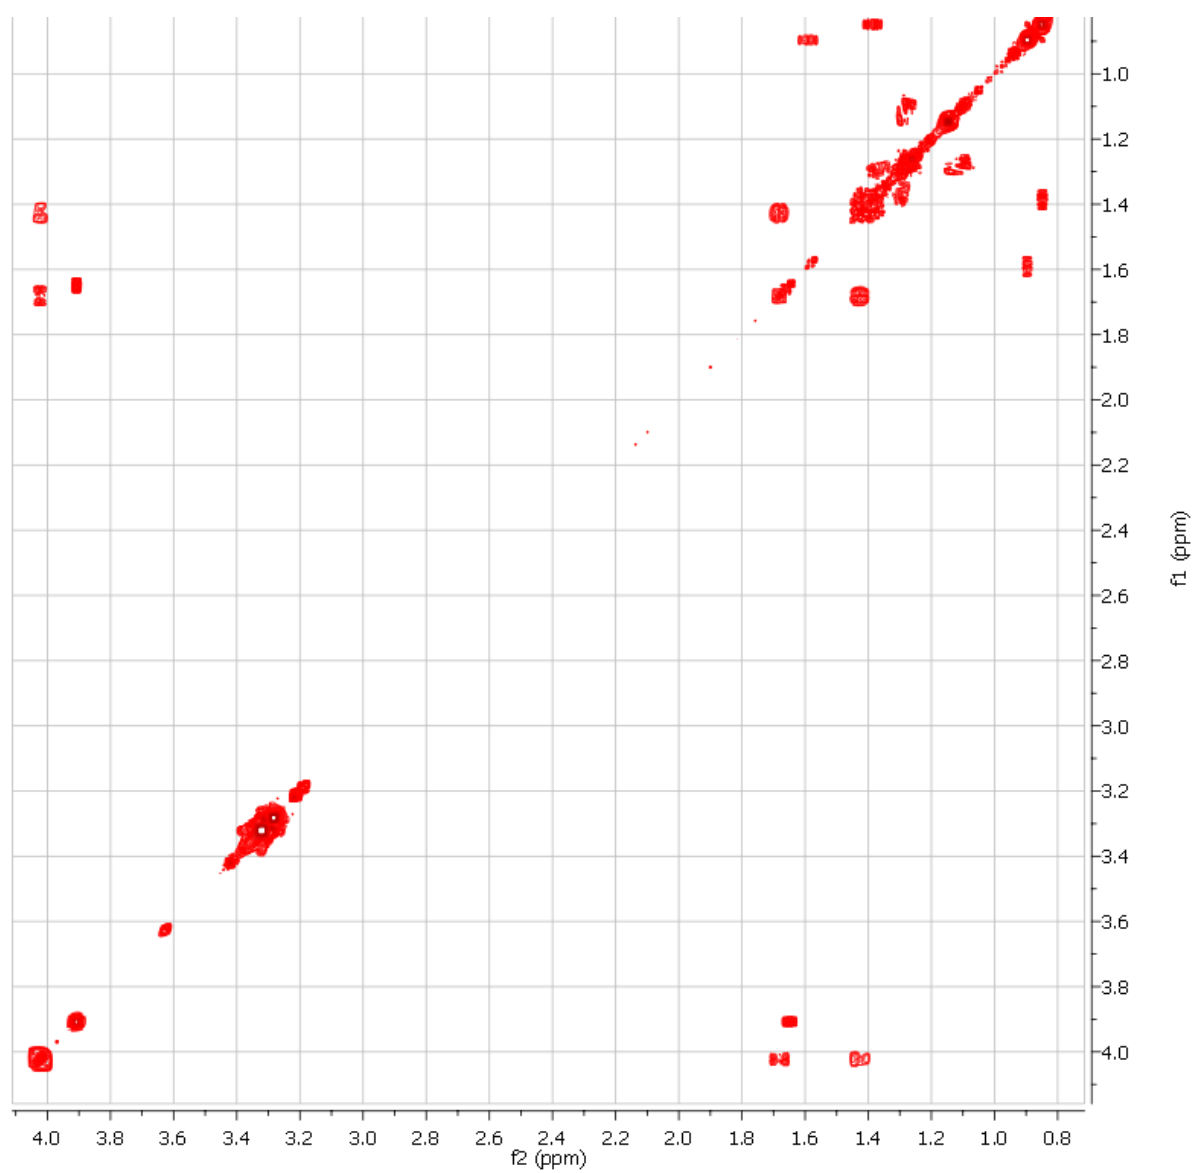

HSQC spectrum of compound 1.

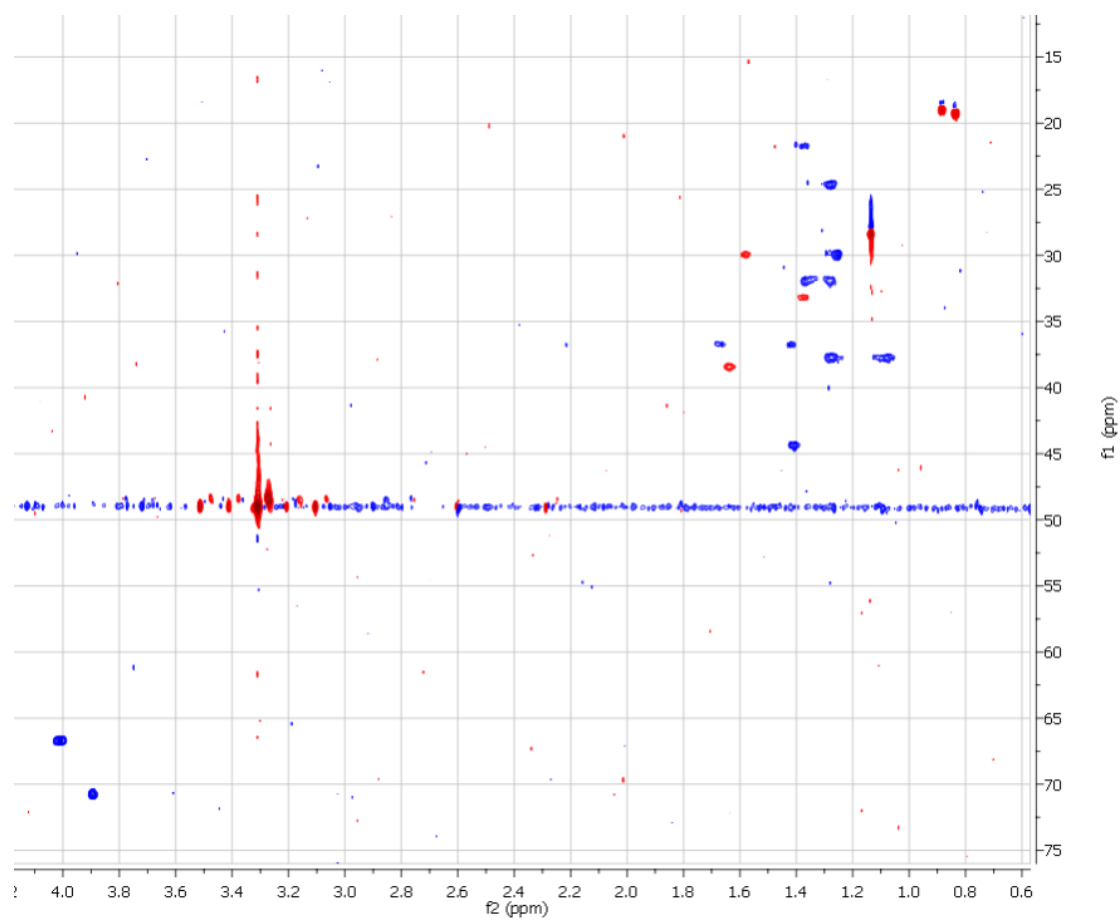

HMBC spectrum of compound 1.

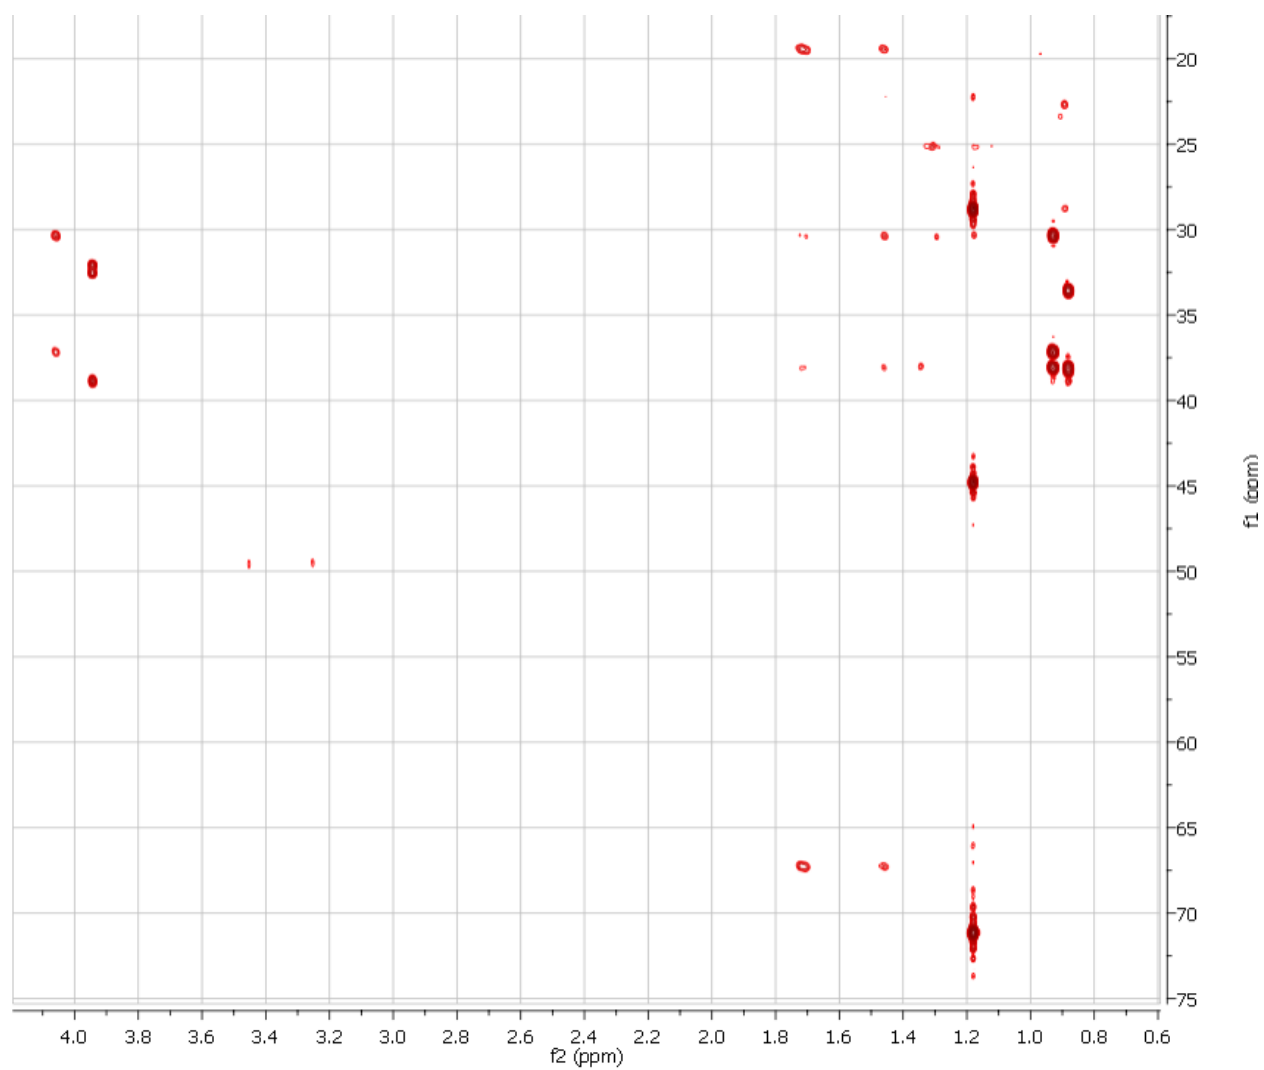

## HRESI mass spectrum of compound 1.

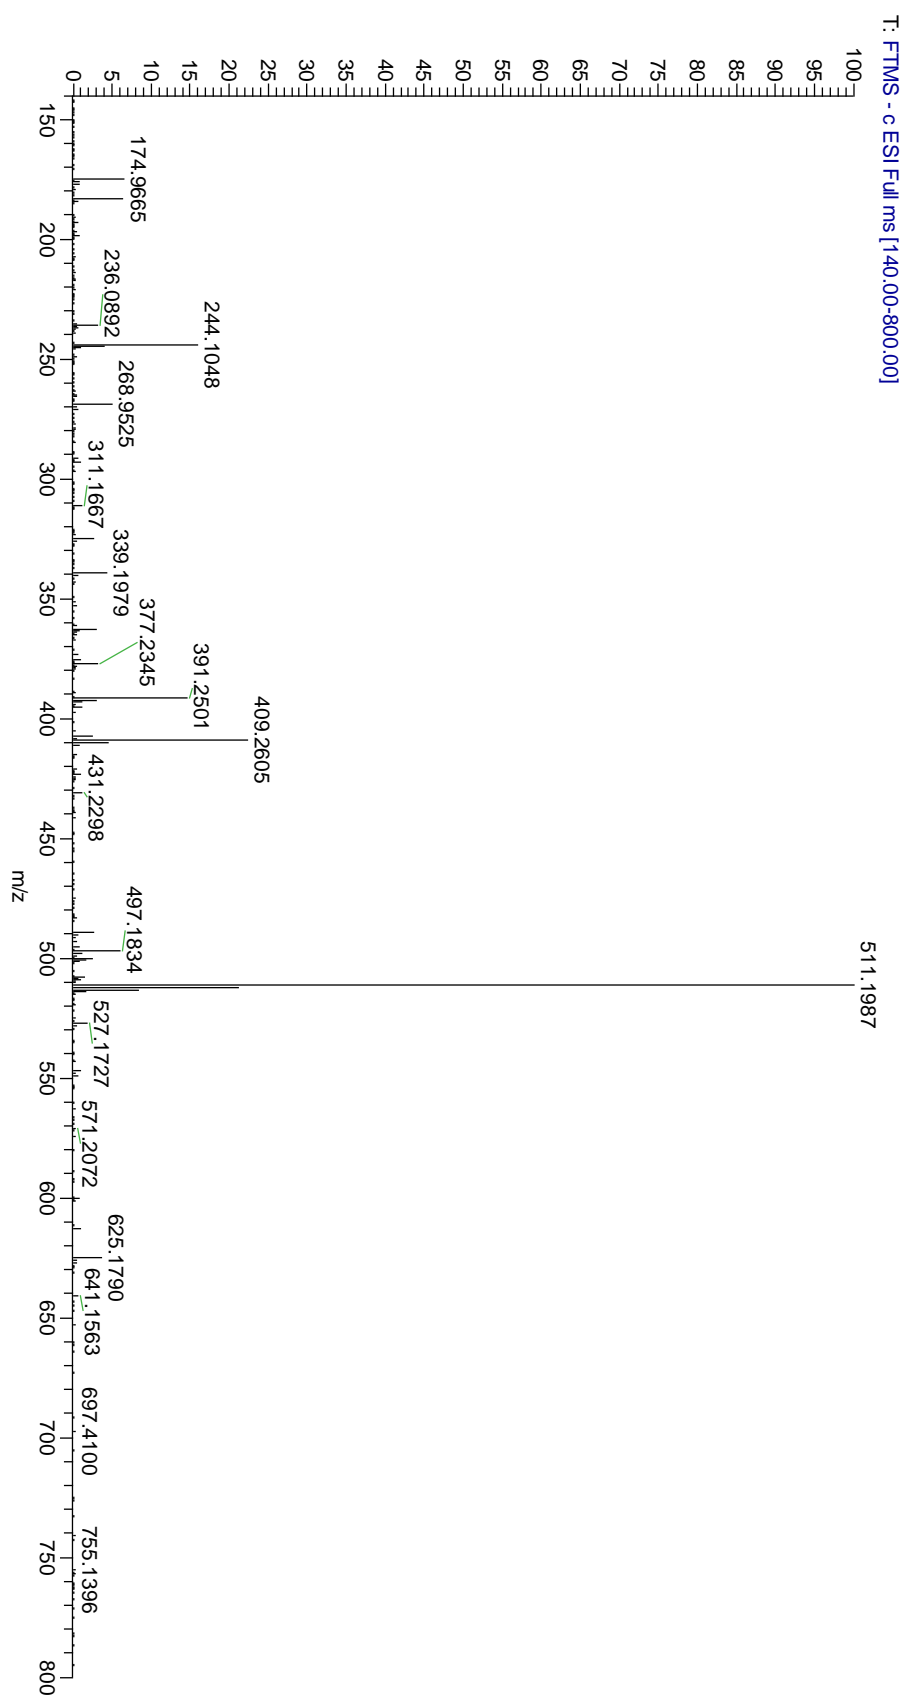

<sup>1</sup>H-NMR spectrum of compound 2.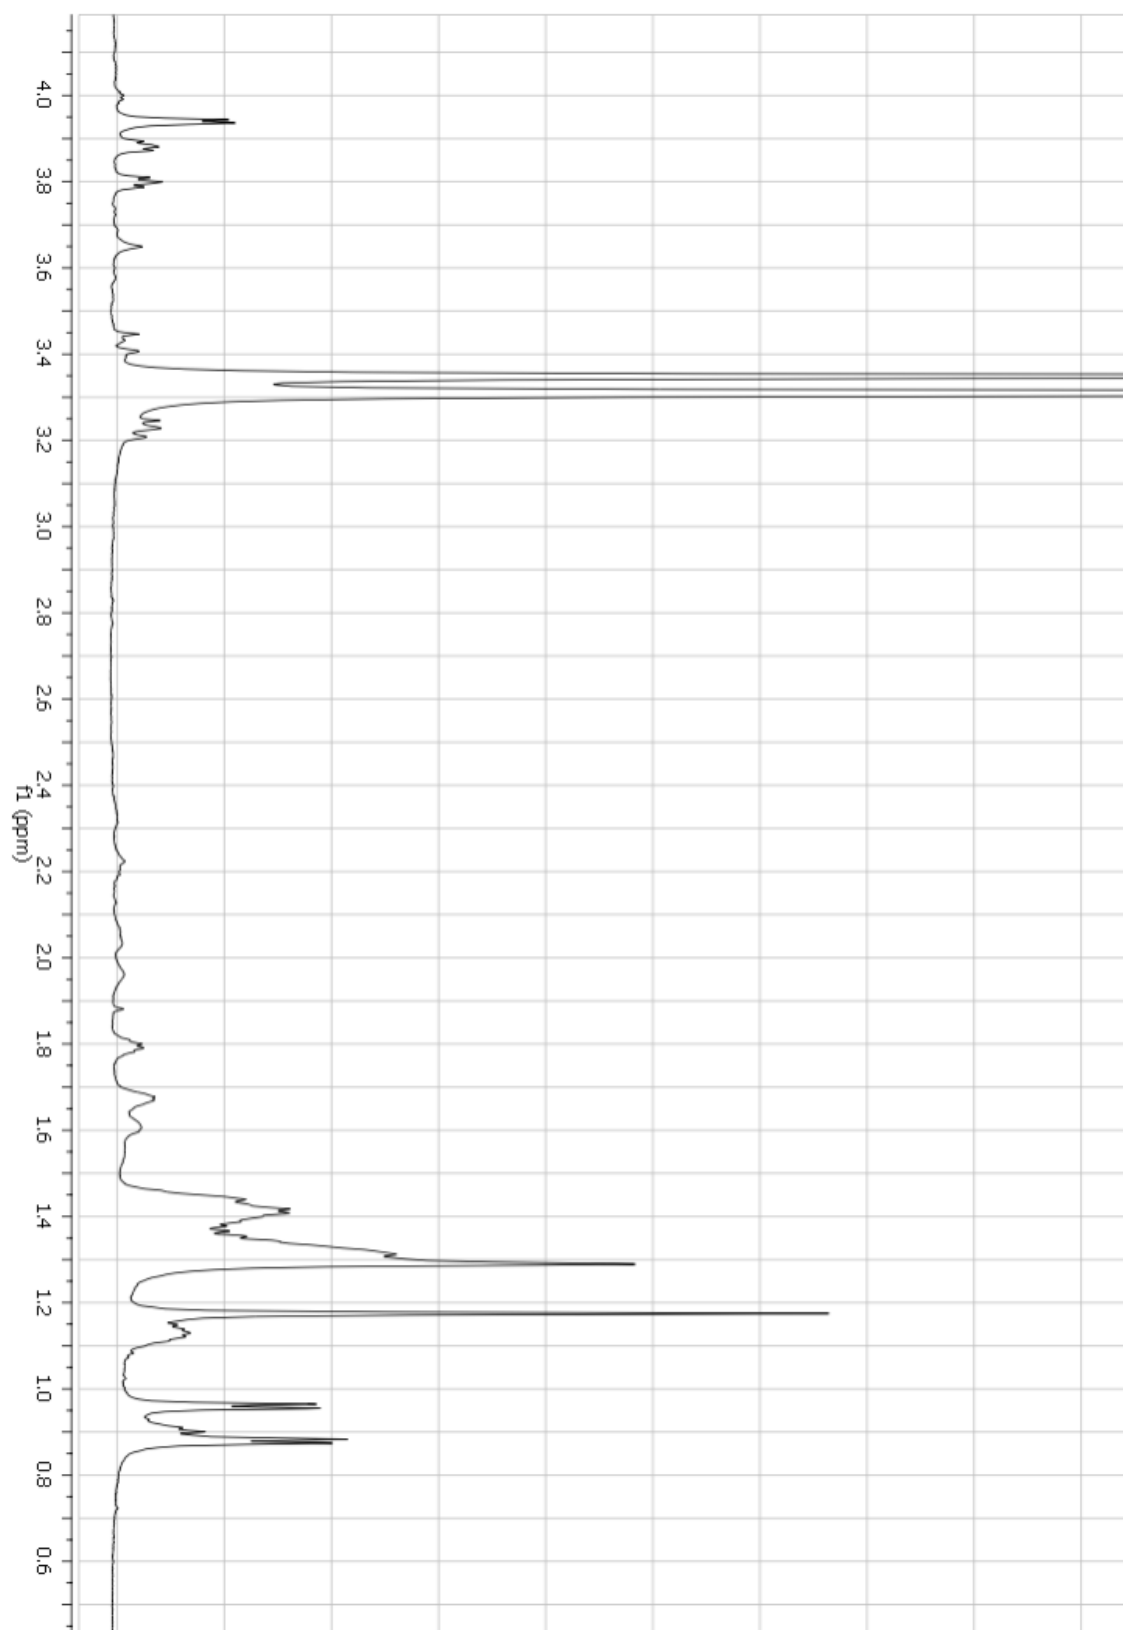

COSY spectrum of compound 2.

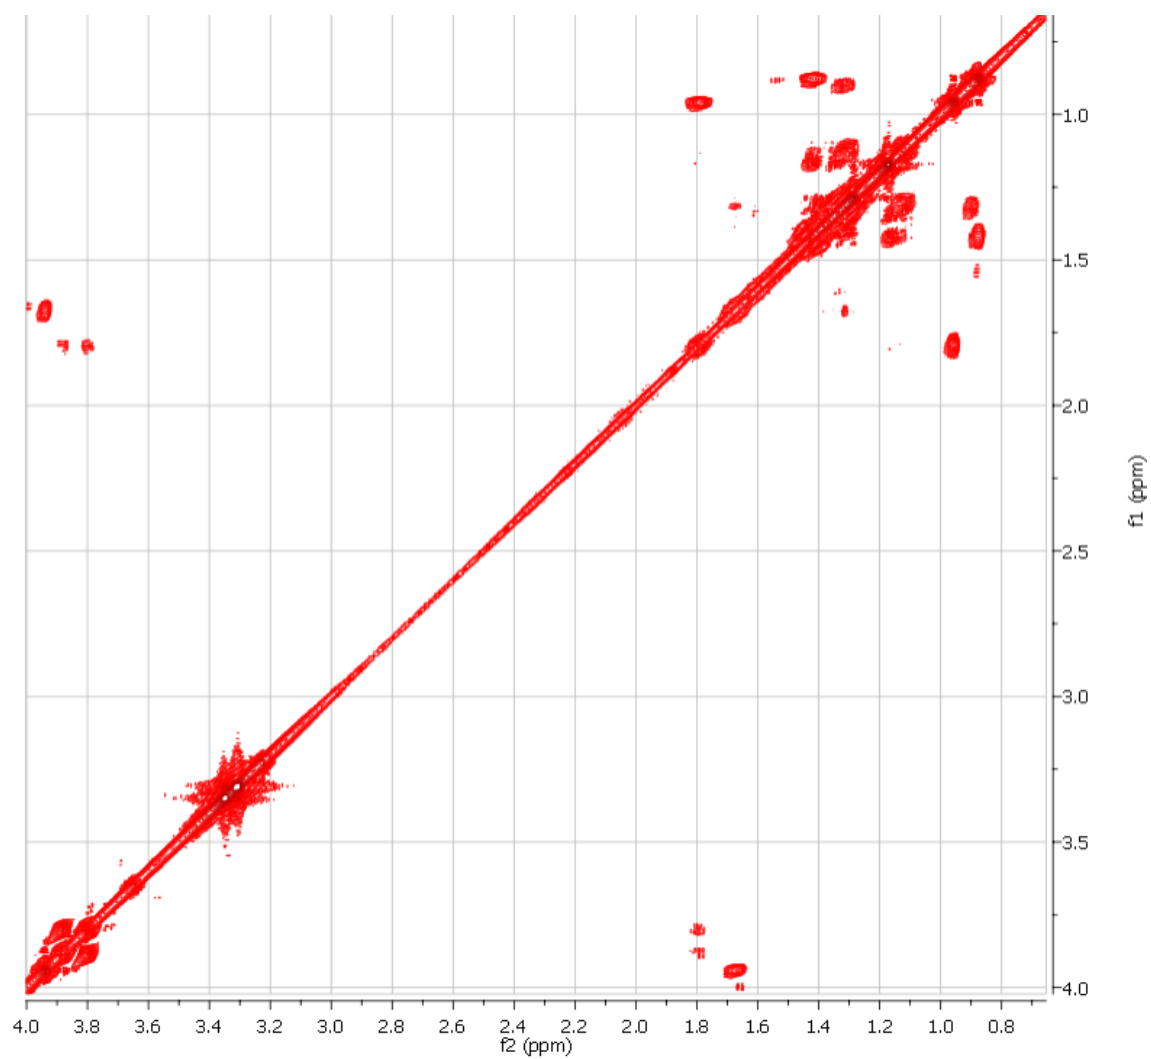

HSQC spectrum of compound 2.

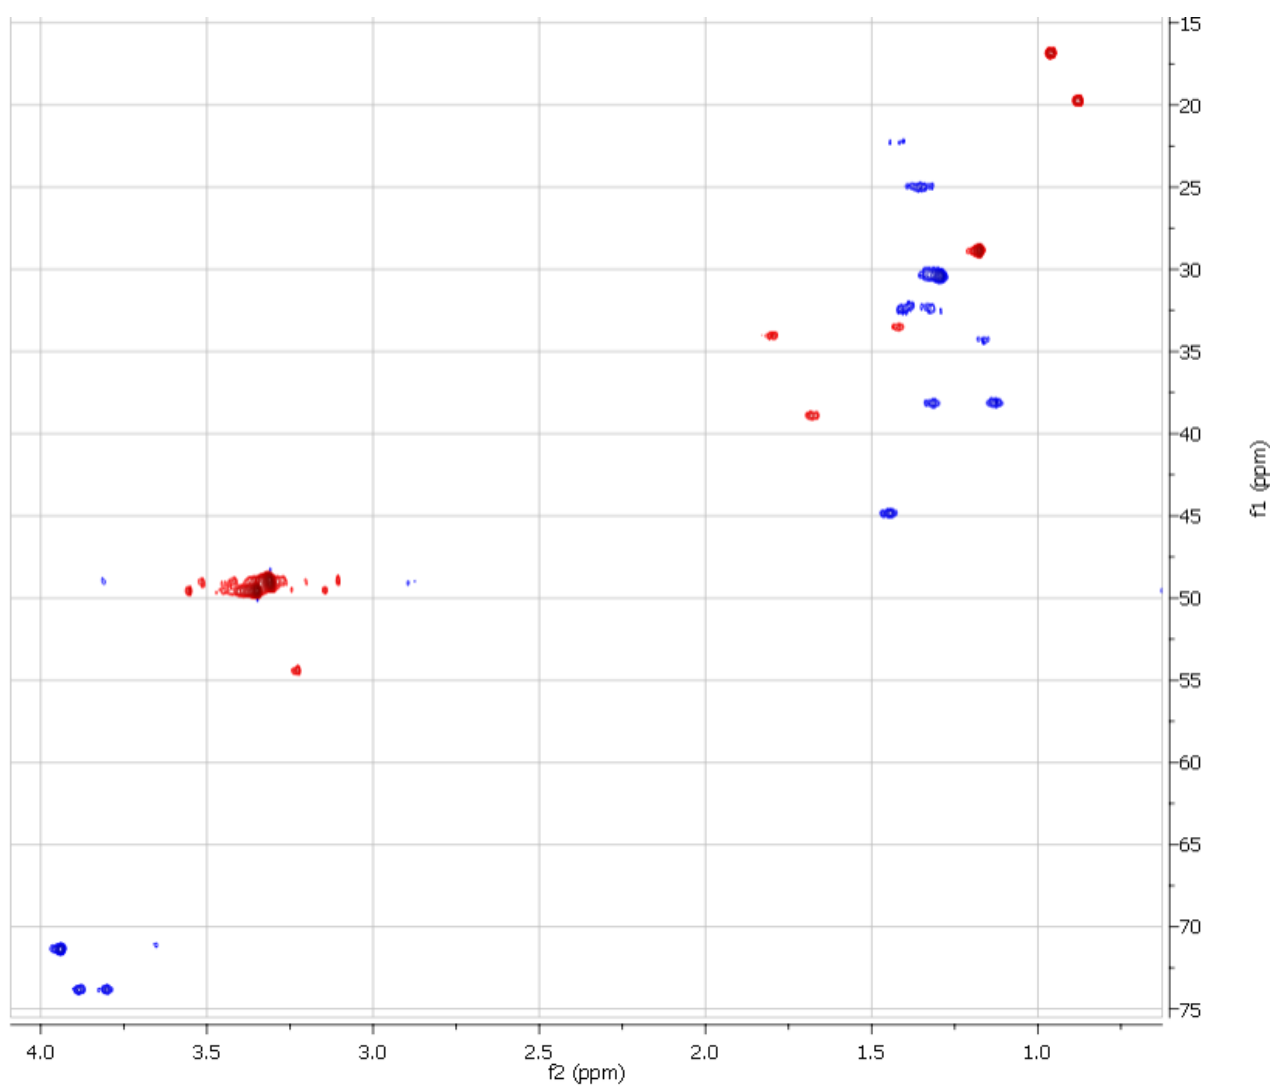

HMBC spectrum of compound 2.

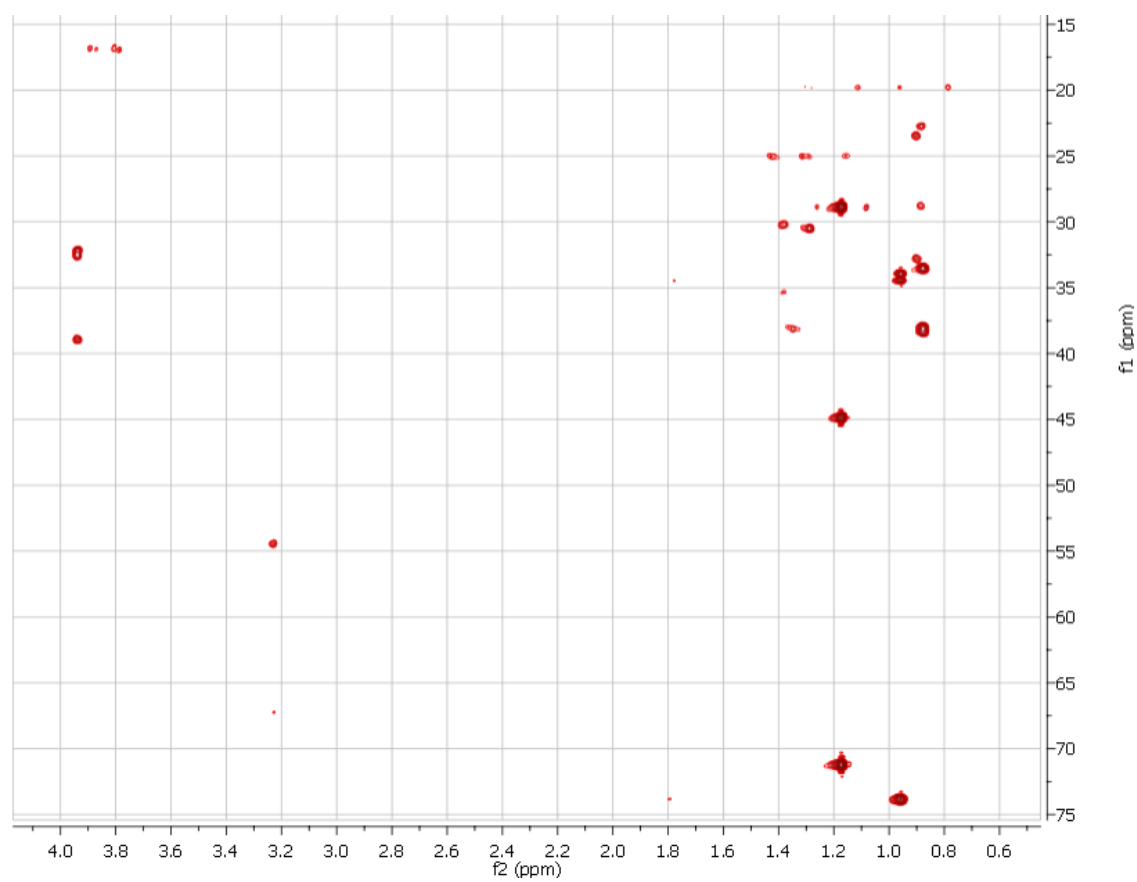

HRESI mass spectrum of compound 2.

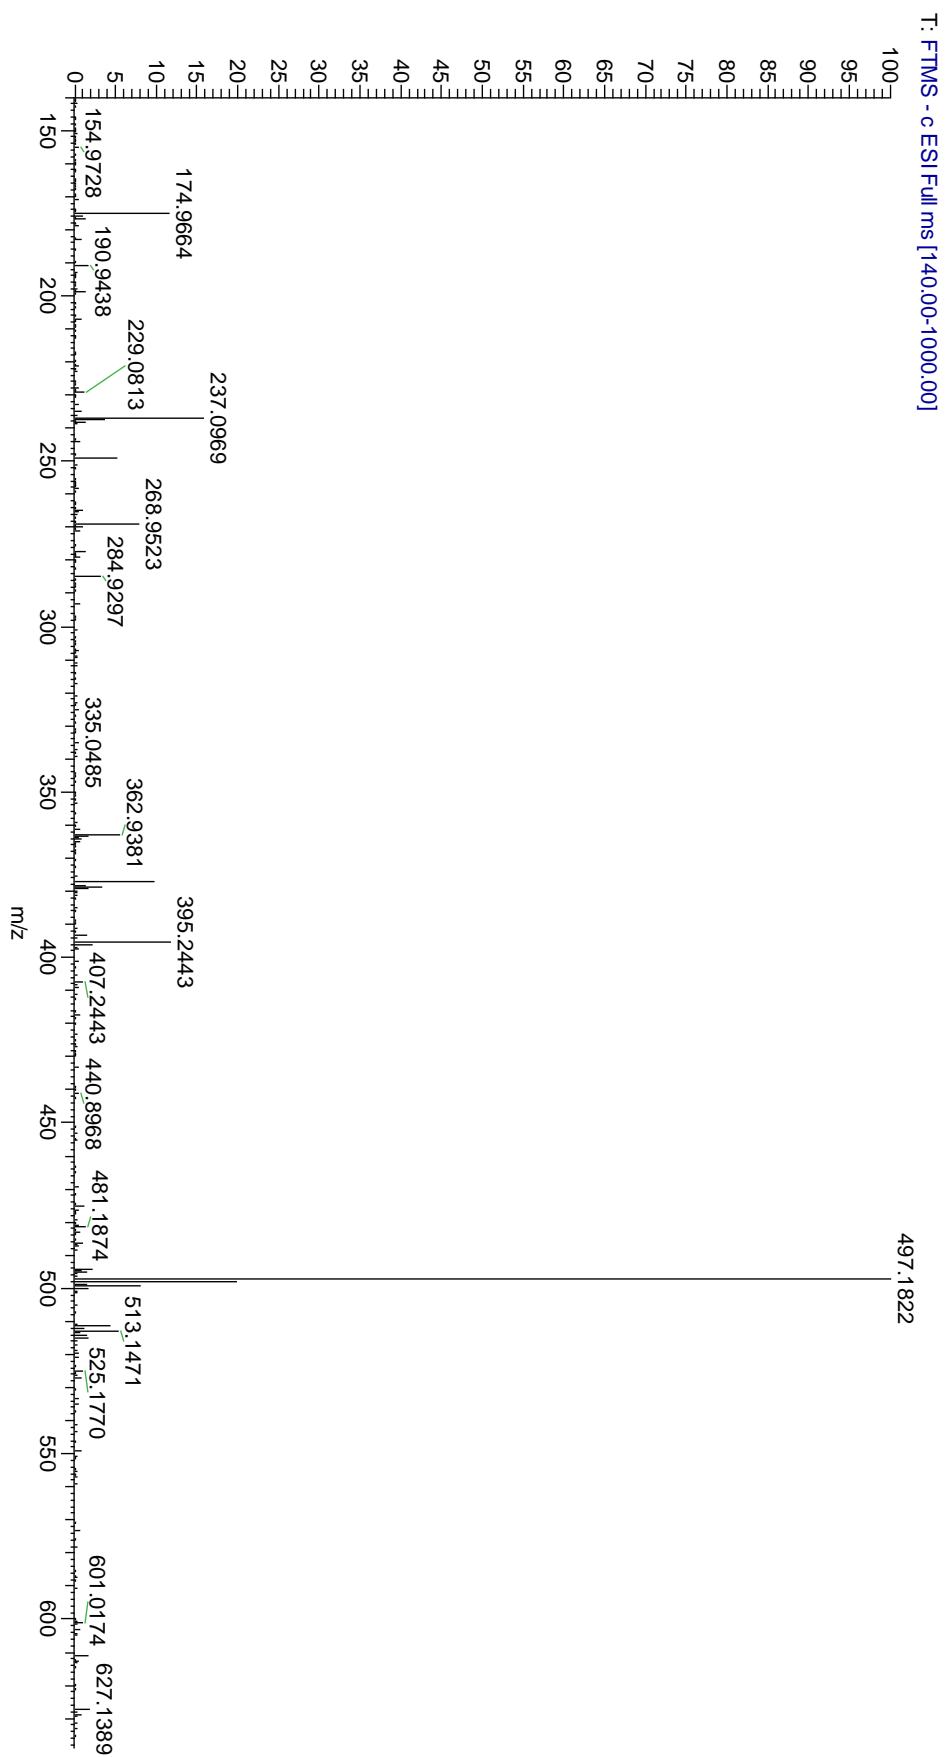

$^1\text{H}$ -NMR spectrum of compound 3.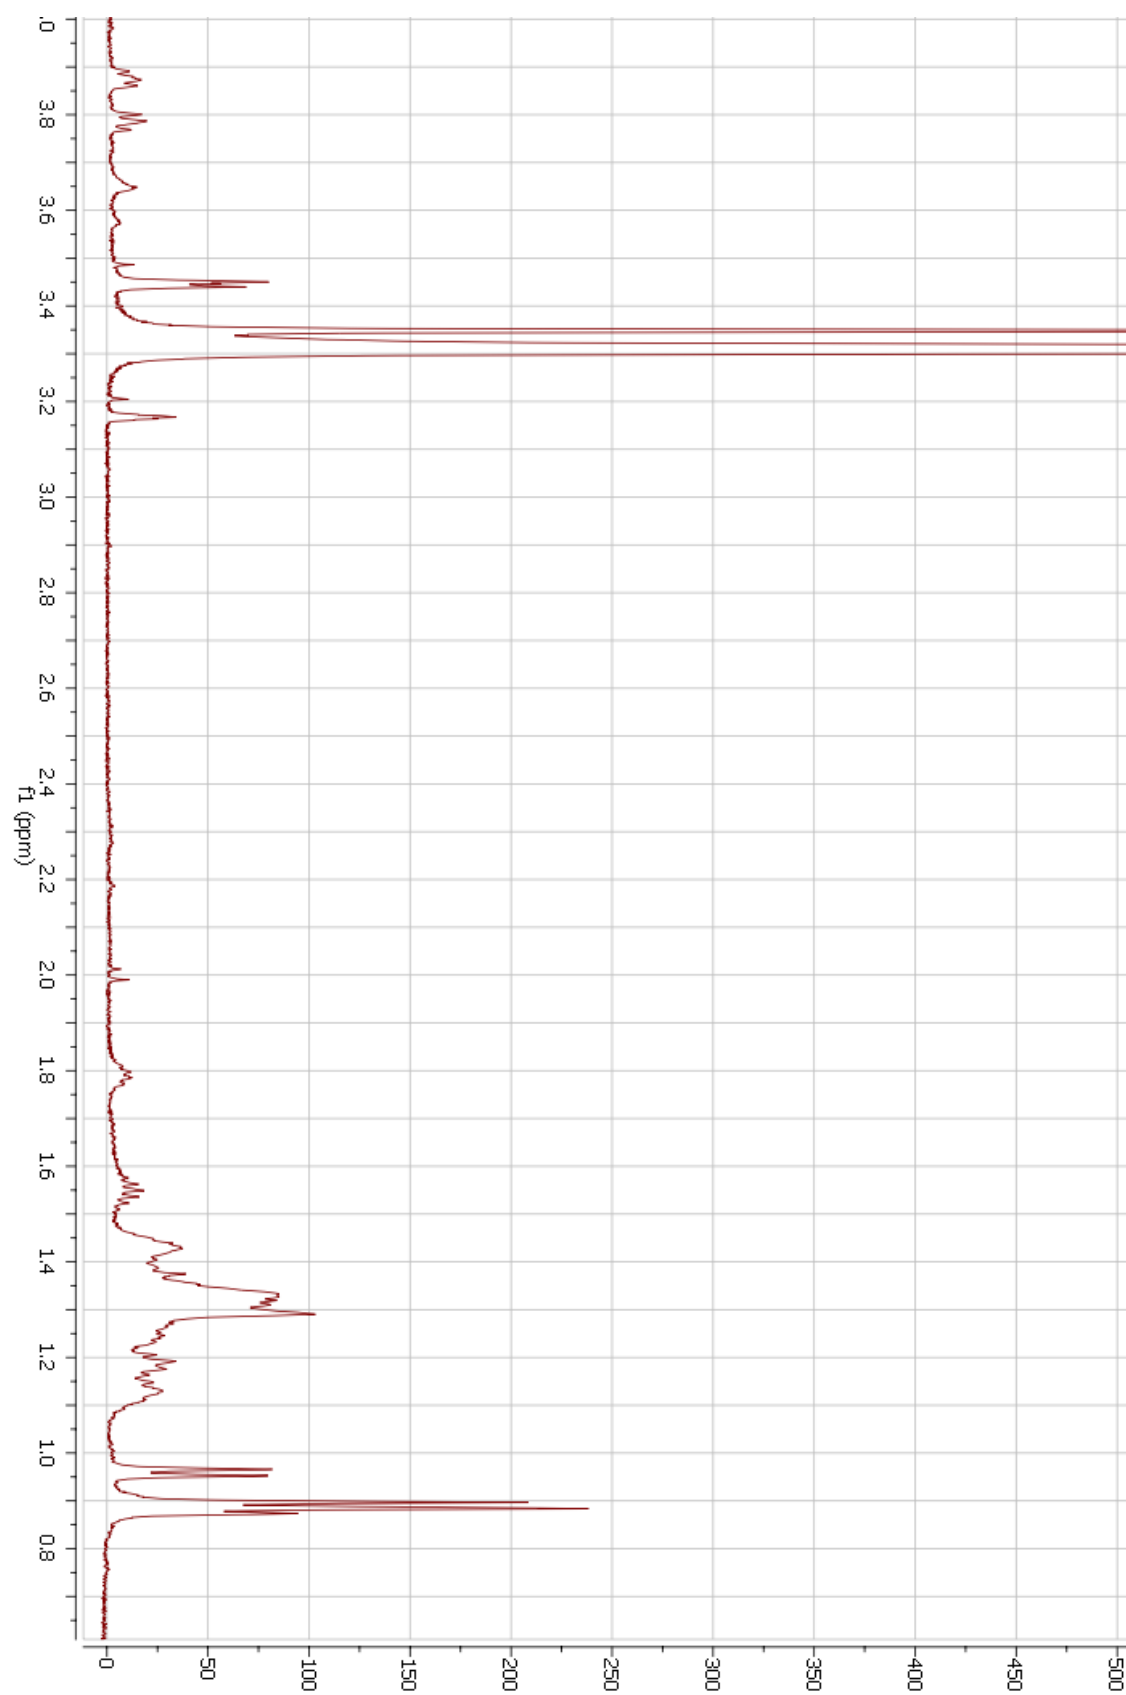

COSY spectrum of compound 3.

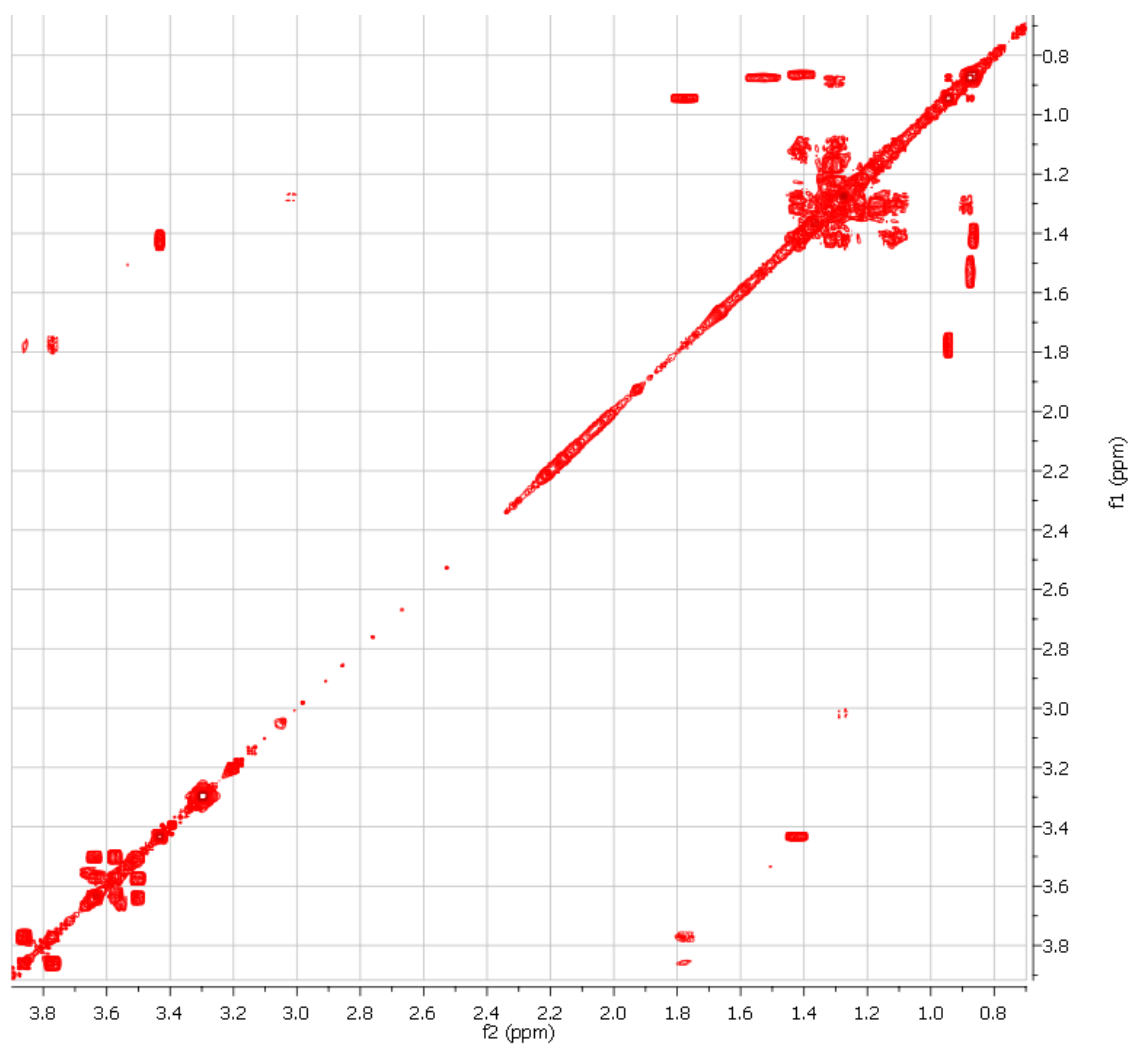

HSQC spectrum of compound 3.

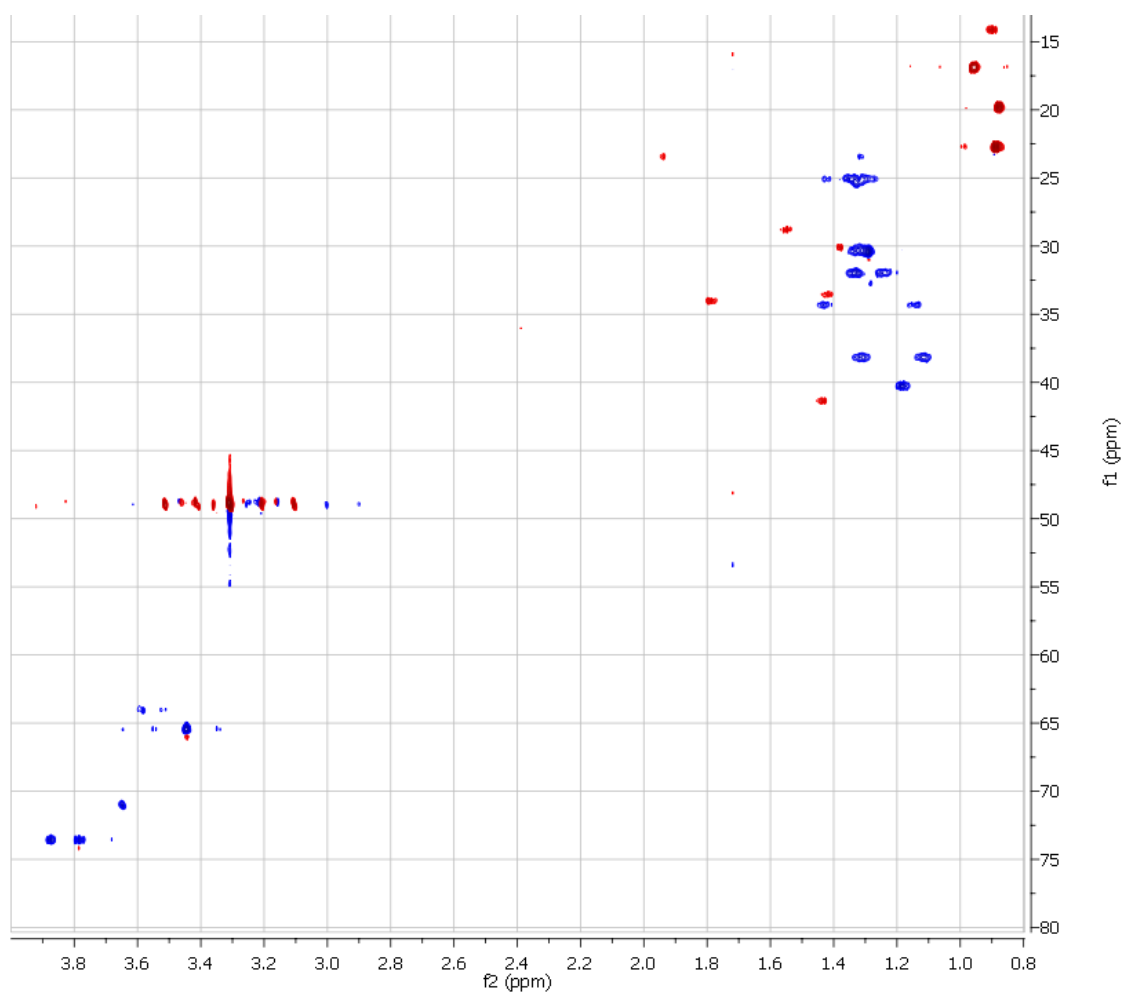

HMBC spectrum of compound 3.

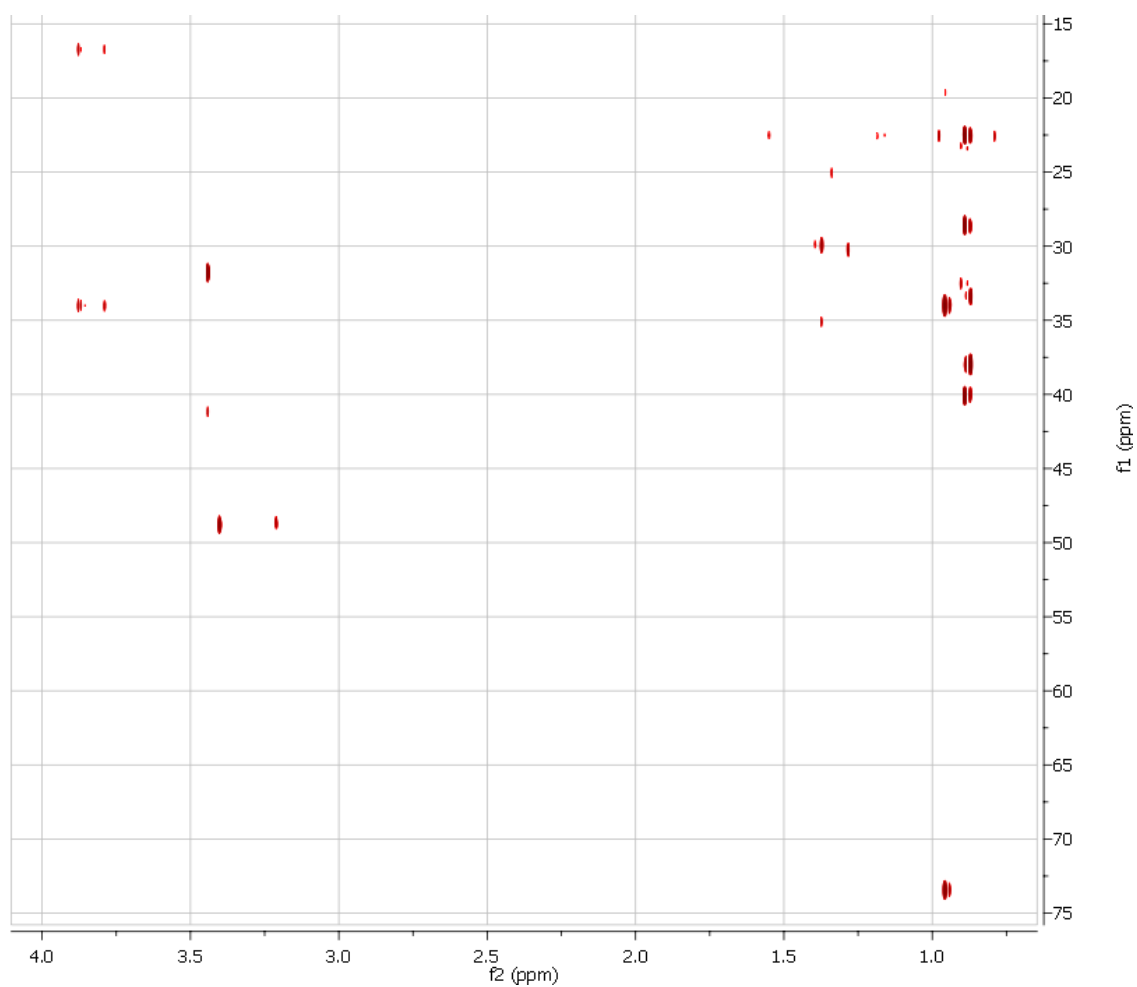

HRESI mass spectrum of compound 3.

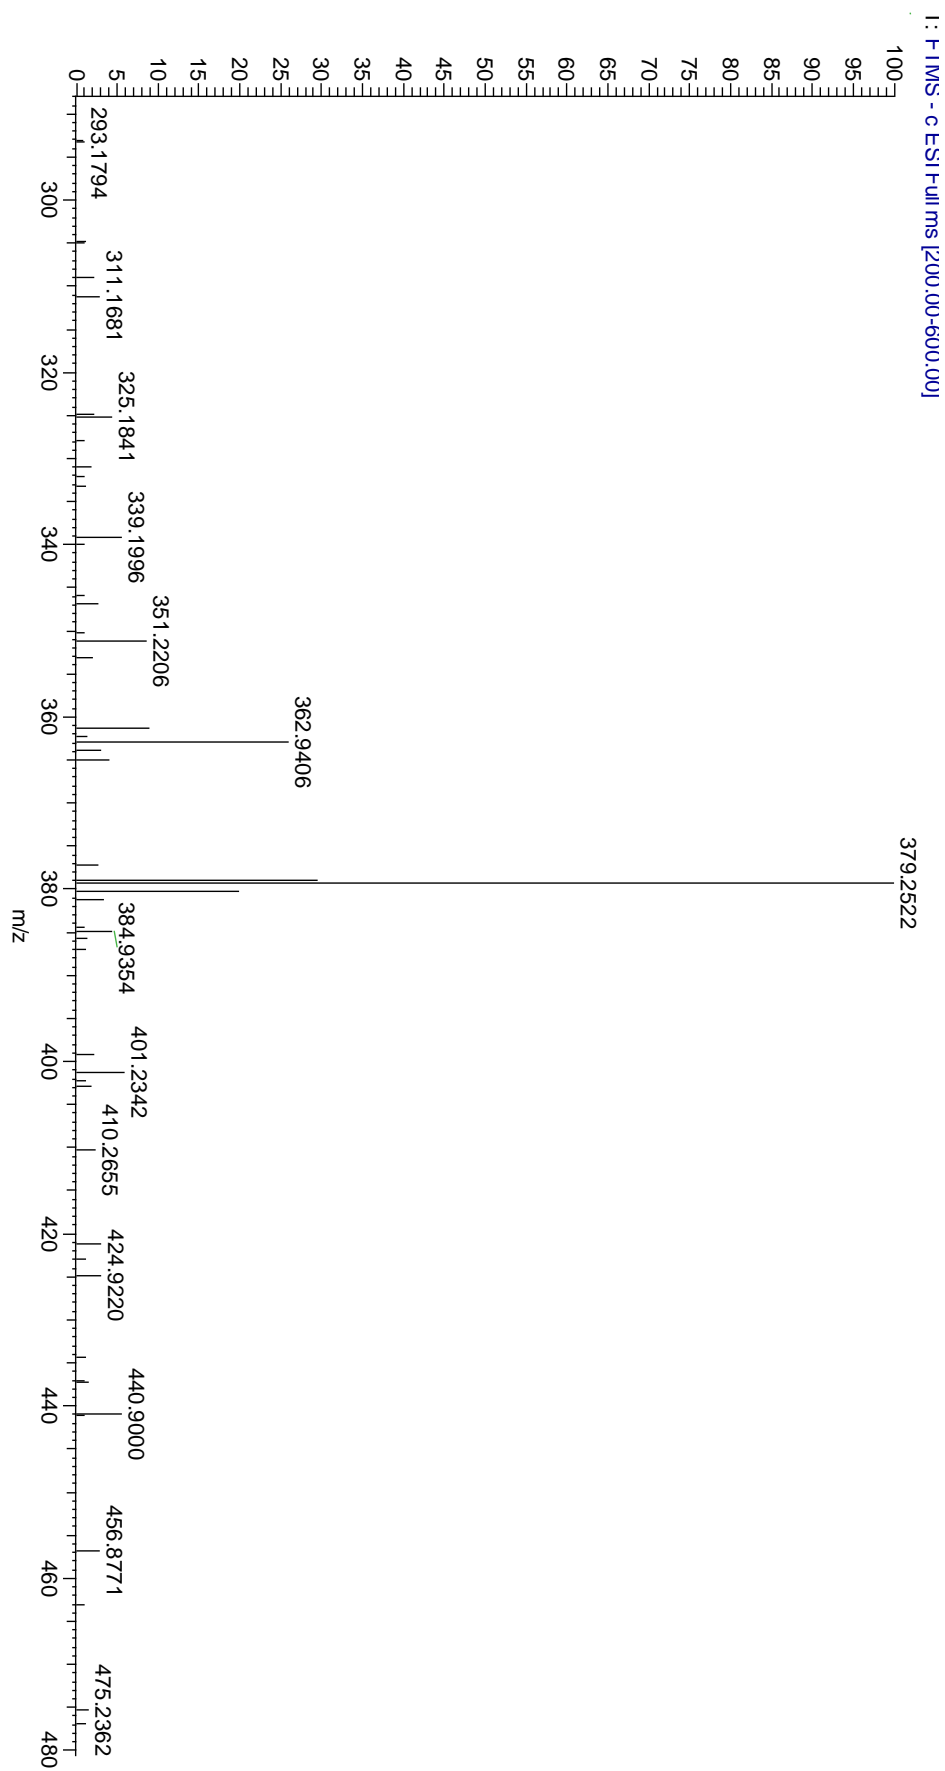

Supplement: Supplementary file 1 [file molecules-17-12642-s001.pdf]
